# Supplementary material for: Mercury accumulation in leaves of different plant types – the significance of tissue age and specific leaf area
Source: Copernicus journal article supplement (doi:10.5194/bg-2021-117), 2021-05-17

Suggestion for new version of Figure 7:

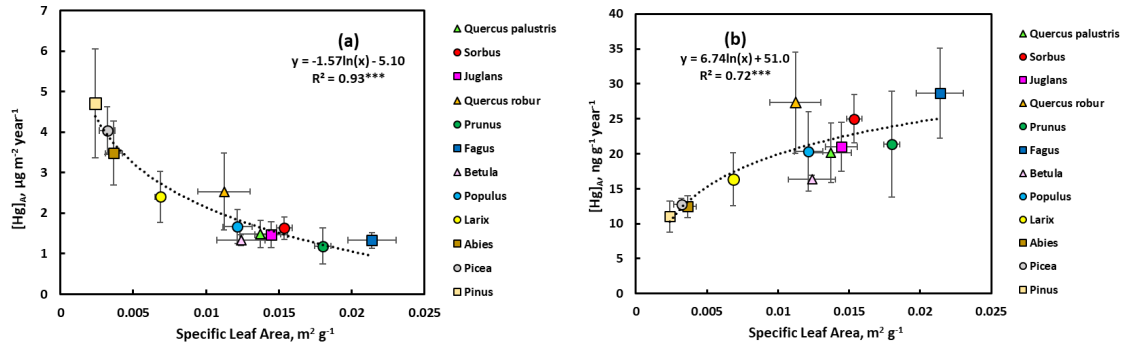

Comparison of Figure 7 a and b with separate function for conifers and broadleaved trees compared with the combined function (not intended to be included in the manuscript):

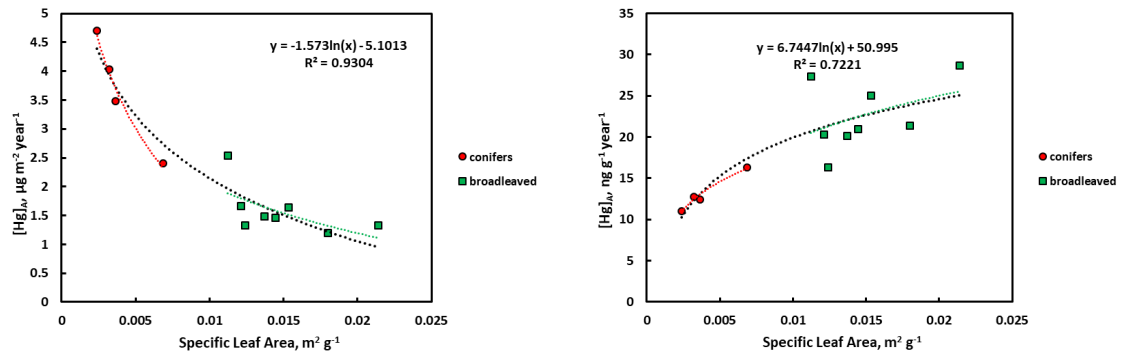

Relationship of  $[Ca]_A$  with SLA for individual trees (as Figure 7a in our original manuscript but for Ca) and for the different species (new version of Figure 7a) – these figures are for comparison with another element and not intended to be included in the manuscript.

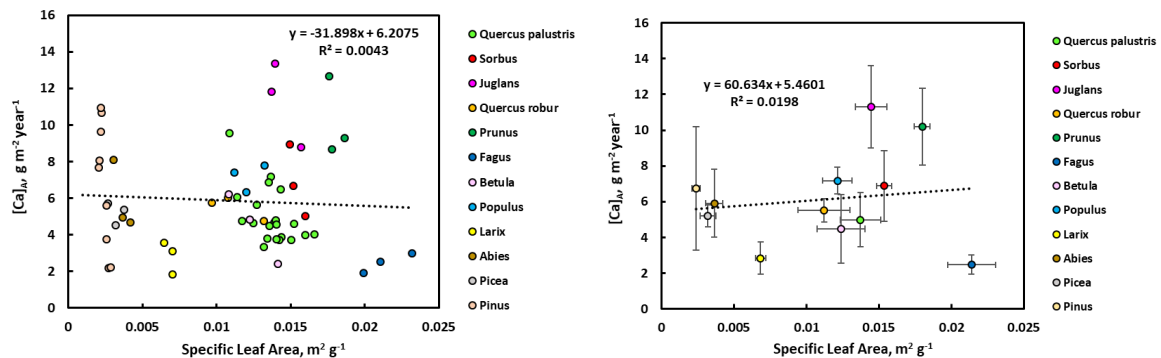

Supplement: Supplementary file [file bg-2021-117-AC2-supplement.pdf]
